# Supplementary material for: Need for Expansion of Pharmacy Education Globally for the Growing Field of Nanomedicine
Source: MDPI journal article supplement (doi:10.3390/pharmacy10010017), 2022-01-21
Supplement: s1 [file s1]

**Table S1.** US pharmacy dual degree programs and nanomedicine focus (\*programs that include nanomedicine topics)Adapted from [37].

| Institution                                    | Program                                                         | Dual Degree Program |     |
|------------------------------------------------|-----------------------------------------------------------------|---------------------|-----|
|                                                |                                                                 | MS                  | PhD |
| Albany College of Pharmacy and Health Sciences |                                                                 | 1*                  |     |
| Auburn University                              | Harrison School of Pharmacy                                     |                     | 1*  |
| Campbell U                                     | College of Pharmacy & Health Sciences                           | 1                   |     |
| Creighton U                                    | School of Pharmacy and Health Professions                       | 1                   |     |
| Drake U                                        | College of Pharmacy & Health Sciences                           | 1*                  |     |
| Duquesne U                                     | School of Pharmacy                                              | 1                   |     |
| Fairleigh Dickinson U                          | School of Pharmacy                                              | 1                   |     |
| Idaho St U - AK                                | College of Pharmacy                                             |                     | 1*  |
| Idaho St U                                     | College of Pharmacy                                             |                     | 1*  |
| Lipscomb U                                     | College of Pharmacy                                             | 1                   |     |
| Loma Linda U                                   | School of Pharmacy                                              | 1*                  |     |
| Long Island U                                  | Arnold & Marie Schwartz College of Pharmacy and Health Sciences | 1*                  |     |
| Manchester U                                   | Pharmacy Program                                                | 1*                  |     |
| Med U South Carolina                           | College of Pharmacy                                             | 1*                  | 1*  |
| Mercer U                                       | College of Pharmacy                                             | 1*                  | 1*  |
| North Dakota St U                              | School of Pharmacy                                              |                     | 1*  |
| Oregon St U                                    | College of Pharmacy                                             |                     | 1*  |
| Pacific U Oregon                               | School of Pharmacy                                              | 1*                  |     |
| PCOM - GA                                      | School of Pharmacy                                              | 1                   |     |
| Regis U                                        | Rueckert-Hartman College for Health Professions                 | 1                   |     |
| Rosalind Franklin U Med Sci                    | College of Pharmacy                                             |                     | 1*  |
| Samford U                                      | McWhorter School of Pharmacy                                    | 1                   |     |
| South Dakota St U                              | College of Pharmacy and Allied Health Professions               |                     | 1*  |
| Southern Illinois Edwardsville                 | School of Pharmacy                                              | 1                   |     |
| Temple U                                       | School of Pharmacy                                              | 1                   |     |
| Ohio St U, The                                 | College of Pharmacy                                             |                     | 1*  |

|                                   |                                                                 |    |    |
|-----------------------------------|-----------------------------------------------------------------|----|----|
| U of Arizona,<br>The              | College of Pharmacy                                             | 1* | 1* |
| U of Findlay,<br>The              | College of Pharmacy                                             | 1  |    |
| U of Iowa, The                    | College of Pharmacy                                             | 1  |    |
| U of Kansas,<br>The               | School of Pharmacy                                              | 1  |    |
| U of Louisiana<br>Monroe, The     | College of Pharmacy                                             |    | 1* |
| U of New<br>Mexico, The           | Health Sciences Center College of Pharmacy                      | 1* |    |
| U of Rhode<br>Island, The         | College of Pharmacy                                             | 1* |    |
| U of Tennessee,<br>The            | College of Pharmacy                                             | 1* | 1* |
| U of Texas<br>Austin, The         | College of Pharmacy                                             |    | 1^ |
| U of Toledo,<br>The               | College of Pharmacy and Pharmaceutical Sciences                 | 1  | 1* |
| U at Buffalo                      | School of Pharmacy and Pharmaceutical Sciences                  | 1* | 1* |
| U of Arkansas<br>Med Sci          | College of Pharmacy                                             | 1  | 1* |
| U of California,<br>San Diego     | Skaggs School of Pharmacy and Pharmaceutical Sciences           |    | 1* |
| U of California,<br>San Francisco | School of Pharmacy                                              |    | 1* |
| U of<br>Connecticut               | School of Pharmacy                                              |    | 1* |
| U of Houston                      | College of Pharmacy                                             | 1* | 1* |
| U of Illinois<br>Chicago          | College of Pharmacy                                             | 1* | 1* |
| U of Kentucky                     | College of Pharmacy                                             | 1* |    |
| U of Maryland                     | School of Pharmacy                                              | 1* | 1* |
| U of Minnesota                    | College of Pharmacy                                             | 1  |    |
| U of Montana                      | Skaggs School of Pharmacy                                       | 1* | 1  |
| U of North<br>Texas HSC           | System College of Pharmacy                                      | 1* | 1* |
| U of South<br>Florida             | School of Pharmacy                                              | 1  |    |
| U of Southern<br>California       | School of Pharmacy John Stauffer Pharmaceutical Sciences Center | 1  | 1* |
| U of the Pacific                  | Thomas J. Long School of Pharmacy                               | 1* | 1  |
| U of the Pacific -<br>Pre-Pharm   |                                                                 | 1  | 1* |
| U of<br>Washington                | School of Pharmacy                                              | 1* | 1* |

|                         |                     |    |    |
|-------------------------|---------------------|----|----|
|                         |                     |    |    |
| Virginia Commonwealth U | School of Pharmacy  | 1* | 1* |
| Washington St U         | College of Pharmacy |    | 1* |
| Wayne St U              | College of Pharmacy |    | 1* |

**Table S2.** Characteristics of a selection of global programs offering nanomedicine education.

| Program (Country)   | Number of students          | Degree programs offered*                                                                                    | Research opportunities offered                                                                 | Student pharmacist careers post graduation                                                                                                             |
|---------------------|-----------------------------|-------------------------------------------------------------------------------------------------------------|------------------------------------------------------------------------------------------------|--------------------------------------------------------------------------------------------------------------------------------------------------------|
| Unige (Switzerland) | 100–150 per year            | Bachelor of Pharmaceutical Sciences,<br>Master in Pharmacy,<br>Master in Biomedical Sciences                | Master/PhD programmes                                                                          | Public pharmacies, industry, hospitals, academic research institutes, international organisations (e.g., WHO, UN), regulatory bodies (Swissmedic, EMA) |
|                     |                             |                                                                                                             |                                                                                                | Health Science Authorities (HSA) Singapore (on regulatory aspects)                                                                                     |
|                     | Up to 50 students per year  | Course in Advances in Drug Delivery (Pharmacy Department, NUS)                                              |                                                                                                | Research Institutes:<br>Institute of Bioengineering and Nanotechnology (IBN)                                                                           |
|                     | About 150 students per year | Bachelor of Engineering (Engineering Science) Specialisation in Nanoscience and Nanotechnology              | Part of the PhD and Master programmes                                                          | Singapore Nanotech companies:                                                                                                                          |
| NUS (Singapore)     |                             | (Bachelor of Engineering (Materials Science and Engineering) - Nanostructured Materials and Nanotechnology) | Final Year Projects for undergraduate students (mainly in Pharmacy, Chemistry and Engineering) | Advanced Materials Technologies Pte Ltd.<br>NanoGlobe<br>Malvern Panalytical (instrumentation) etc.                                                    |
|                     | About 150 students per year |                                                                                                             |                                                                                                | Nanotechnology Startups:<br>Salus Nano<br>Matralix<br>Peregrinephthalmic<br>Ophthalmic<br>PL Nanotechnolog<br>NanoMaterials Technology<br>NanoSun      |

| Masters in Pharmacy<br>(MPharm) |                      |                                                               |                                                                                                 |                                                                                                                                                                                                                                                                  |
|---------------------------------|----------------------|---------------------------------------------------------------|-------------------------------------------------------------------------------------------------|------------------------------------------------------------------------------------------------------------------------------------------------------------------------------------------------------------------------------------------------------------------|
| Liverpool John<br>Moores (UK)   | 150 per year         |                                                               | Principles of research developed across all years culminating in a final year research project. | Undertake a 1-year Foundation training year (pre-registration year) and after successful completion become registered as pharmacists by the General Pharmaceutical Council (GPhC). In addition, students have an option to study MSc programs within the School. |
|                                 |                      | MSc Cosmetic Science (30-45 students)                         |                                                                                                 |                                                                                                                                                                                                                                                                  |
|                                 |                      | MSc Drug Discovery, Development and Delivery (15-20 students) | 3-month project with opportunities to undertake projects with & within companies                |                                                                                                                                                                                                                                                                  |
|                                 | About 60–85 students | MSc Natural Products Discovery (15-20 students)               |                                                                                                 | Career opportunities<br>Product Manufacturing<br>Regulatory & Legislation<br>Research & Development<br>Marketing & Technical                                                                                                                                     |
